# Supplementary material for: Immersive virtual environments and embodied agents for e-learning applications
Source: PeerJ Comput Sci. 2020 Nov 16;6:e315. doi: 10.7717/peerj-cs.315 (PMC7924662; doi:10.7717/peerj-cs.315)
Supplement: Supplemental Information 1 [file peerj-cs-06-315-s001.csv]

Participant_Number	Condition	Gender	Age	Subject	Learning_Disability	Test_Score	Test_Percentage	Satisfaction_engagement_Score	Virtual_Presence_Score	Tutor_Motivation_Score	Q60	Q61	Q62	Q63	Q64	VR_Novelty	Q9	New_Tutor_Motivation_Score	Tutor_Likeability_Score	filter_$
7	1	1	21	2	1	35	79.55	19		15							5			0
8	1	1	21	3	2	26	59.09	30		14							4			0
9	1	1	22	3	2	5	11.36	20		11							4			0
10	1	1	22	9	2	13	29.55	27		9							1			0
11	1	1	21	3	2	37	84.09	28		13							3			0
12	1	1	20	4	2	39	88.64	30		15							5			0
1	1	2	18	1	2	37	84.09	27		9							2			0
2	1	2	18	1	2	39	88.64	26		12							5			0
3	1	2	19	1	2	39	88.64	19		11							3			0
4	1	2	21	10	2	44	100	23		7							2			0
5	1	2	18	1	2	28	63.64	18		8							3			0
6	1	2	21	13	2	27	61.36	25		11							3			0
24	2	1	21	8	2	34	77.27	30	16						2	1				0
13	2	2	20	1	2	36	81.82	29	12						5	1				0
15	2	2	21	1	2	11	25	16	9						6	1				0
16	2	2	22	1	2	23	52.27	20	14						4	1				0
17	2	2	22	1	2	33	75	32	14						3	1				0
19	2	1	21	1	2	33	75	26	13						6	2				0
20	2	1	19	11	2	36	81.82	32	16						4	2				0
21	2	1	23	1	2	12	27.27	33	15						5	2				0
22	2	1	21	6	2	41	93.18	33	17						5	2				0
14	2	2	22	1	2	18	40.91	28	18						7	2				0
18	2	2	18	1	2	33	75	26	15						3	2				0
23	2	1	22	11	1	37	84.09	24	14						5	4				0
34	3	1	18	1	2	8	18.18	17	13	7	6	1	1	7		1	1	1	6	1
35	3	1	21	5	2	21	47.73	31	21	8	6	2	2	6		1	3	3	5	1
26	3	2	18	1	2	23	52.27	15	15	9	4	1	1	7		1	1	1	8	1
27	3	2	22	1	2	37	84.09	24	14	11	1	5	4	4		1	3	3	8	1
28	3	2	23	7	2	17	38.64	27	17	10	6	2	2	6		1	4	4	6	1
25	3	2	21	12	2	30	68.18	32	15	6	4	7	7	4		2	1	1	5	1
29	3	2	18	1	2	34	77.27	28	12	9	6	2	1	7		2	3	3	6	1
30	3	2	18	1	2	33	75	18	15	6	5	2	2	6		2	2	2	4	1
32	3	1	20	1	2	37	84.09	28	14	14	2	6	1	4		4	5	5	9	1
31	3	1	20	3	2	30	68.18	30	15	8						5	3	3	5	1
33	3	1	21	6	2	37	84.09	31	13	9	7	1	2	6		5	3	3	6	1
36	3	1	18	9	2	33	75	28	12	9	2	2	2	2		5	1	1	8	1
44	4	1	40	2	2	26	59.09	28	14	12	2	4	3	4		1	4	4	8	1
39	4	2	19	1	1	26	59.09	24	17	11	4	4	4	4		1	2	2	9	1
40	4	2	18	1	2	16	36.36	13	16	9	5	3	5	5		1	4	4	5	1
45	4	1	21	3	2	17	38.64	21	16	9	7	2	2	6		2	2	2	7	1
46	4	1	21	5	2	34	77.27	28	17	11	4	4	4	4		2	3	3	8	1
47	4	1	21	5	2	28	63.64	30	11	11	3	5	4	4		2	3	3	8	1
48	4	1	22	4	2	15	34.09	20	14	9	6	2	2	6		2	3	3	6	1
37	4	2	20	1	2	19	43.18	31	11	15	4	4	4	4		2	5	5	10	1
38	4	2	18	1	2	28	63.64	25	13	7	7	2	2	7		2	2	2	5	1
42	4	2	23	10	2	35	79.55	30	14	8	3	3	5	5		2	2	2	6	1
43	4	1	24	4	2	40	90.91	24	12	9						3	4	4	5	1
41	4	2	18	1	2	32	72.73	34	17	9	5	3	3	5		5	3	3	6	1
